# Supplementary material
Source: PubMed Central journal article supplement (PMC3807872)
Supplement: NIHMS496465-supplement-Supp_Fig_S1-S4_Table_S1-S2.pdf [file NIHMS496465-supplement-Supp_Fig_S1-S4_Table_S1-S2.pdf]

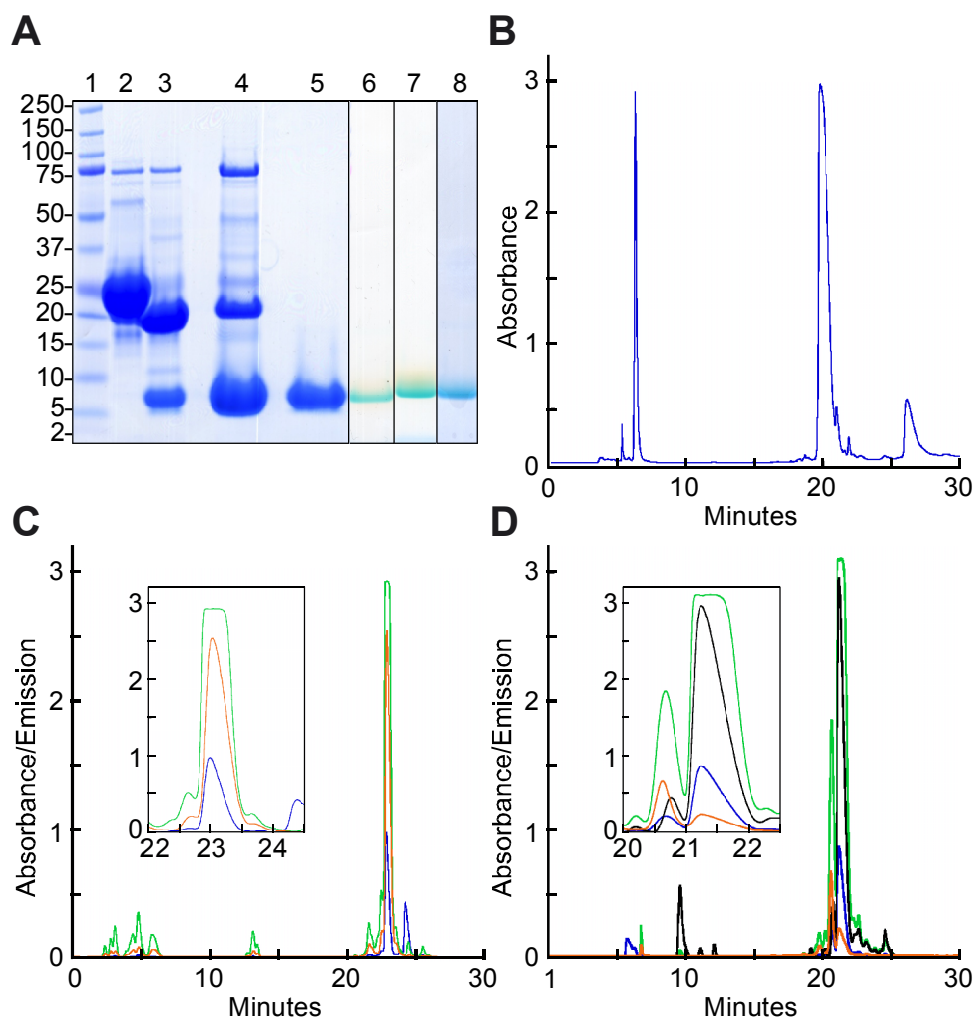

**Fig. S1. Preparation of FRETs-rVWF71.** (A) Polyacrylamide 4-12% gel electrophoresis. Lanes are: 1, protein markers; 2, thioredoxin-rVWF71 after Ni-NTA agarose; 3, after TEV protease cleavage; 4, after rechromatography on Ni-NTA agarose; 5, after purification by HPLC; 6, purified DyLight 633-rVWF71; 7, purified FRETs-rVWF71; 8, purified FRETs-rVWF71. Gels were stained with Simply Blue SafeStain except for lanes 6 and 7, which are unstained. (B) Purification of rVWF71 on C18 in 0.1% TFA developed with 20-90% acetonitrile, monitored for absorbance at 280 nm (blue). The 20 min peak corresponds to panel A, lane 5. (C) Purification of DyLight 633-rVWF71 on C18 in 50 mM TEAA, pH 6.0, developed with 20-45% acetonitrile, monitored for absorbance at 280 nm (blue) and 627 nm (green), and for emission at 658 nm (orange, arbitrary scale) after excitation at 635 nm. The inset shows an expanded view of the 23 min peak. (D) After modification with IRDye QC-1, FRETs-rVWF71 was purified by HPLC with additional monitoring of absorbance at 819 nm (black). The inset shows an expanded view of the 21 min peak.

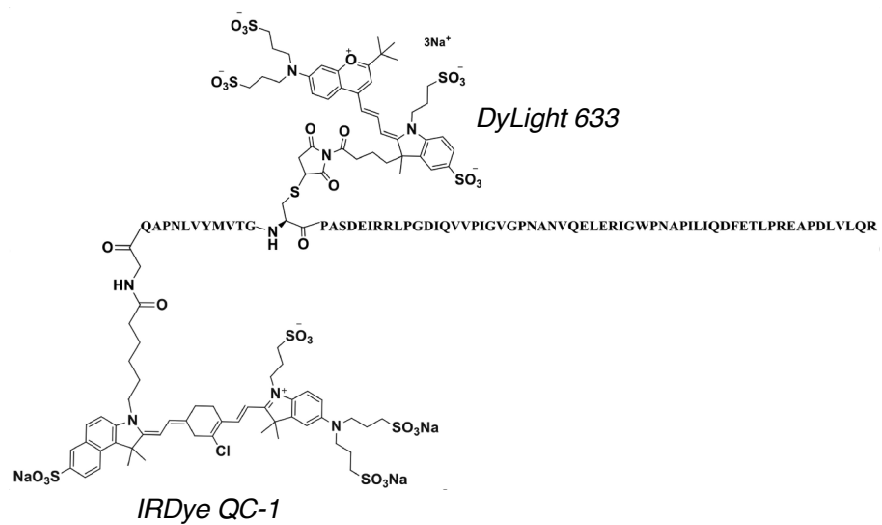

**Fig. S2. Structure of FRETs-rVWF71**

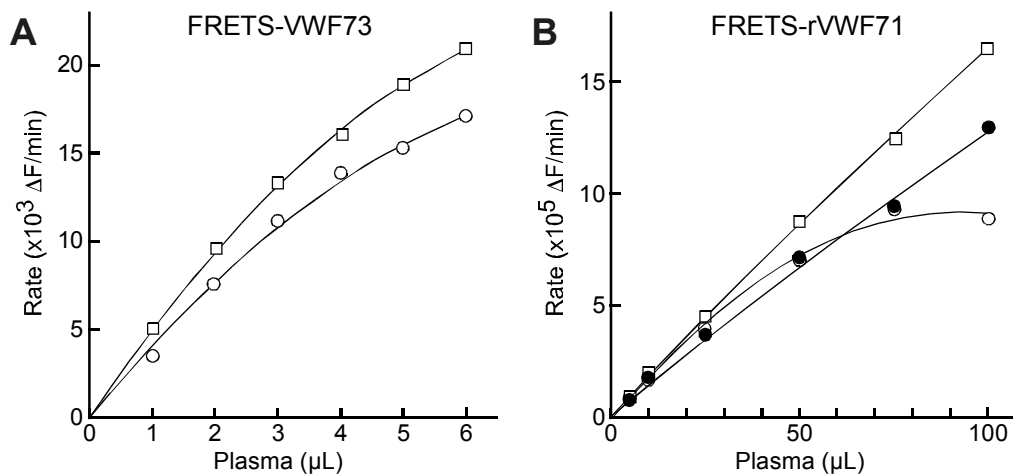

**Fig. S3. Comparison of FRET-VWF73 and FRET-rVWF71 assays with citrated and Li<sup>+</sup>-heparin plasma.** (A) Matched plasma samples anticoagulated with Li<sup>+</sup>-heparin (open squares) and citrate (open circles) were assayed with FRET-VWF73 as described (7). The difference between the curves is due to dilution of the citrated plasma with one-ninth volume of sodium citrate. (B) The same matched plasma samples were assayed with FRET-rVWF71. The Li<sup>+</sup>-heparin plasma (open squares) and citrated plasma (open circles) were assayed as described under "Materials and Methods." The sharp deviation from linearity for citrated plasma at the 100 μL point is caused by chelation of calcium ions in the assay buffer by excess citrate. Supplementation of citrated plasma assays with 6 mM CaCl<sub>2</sub> (filled circles), approximately equal to the final 5.5 mM citrate concentration of the 100 μL assay point, restored the desired linear behavior. The difference between the curves for the Li<sup>+</sup>-heparin (open squares) and citrate+CaCl<sub>2</sub> conditions (filled circles) is due to dilution of citrated plasma with one-ninth volume of sodium citrate, as also observed with FRET-VWF73 (panel A). Therefore, ADAMTS13 assays with FRET-rVWF71 can be standardized satisfactorily using either Li<sup>+</sup>-heparin plasma or citrated plasma supplemented with CaCl<sub>2</sub>. Note that the dynamic range of the reaction rate (ΔF/min) across all assay points is approximately two orders of magnitude greater for assays with Li<sup>+</sup>-heparin plasma and FRET-rVWF71 (panel B, open squares) than with citrated plasma and FRET-VWF73 (panel A, open circles).

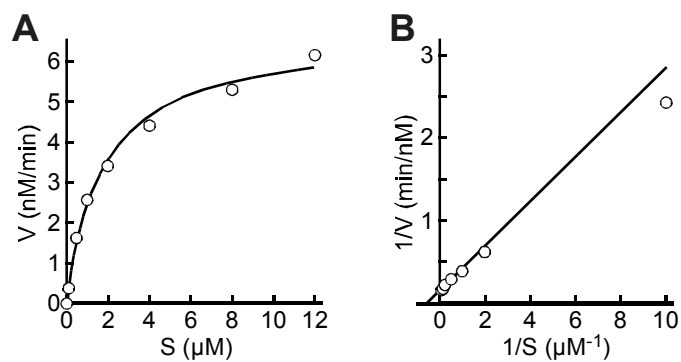

**Fig. S4. Kinetics of FRETs-rVWF71 cleavage by ADAMTS13.** (A) Initial velocities (nM/min) were fitted to the Michaelis-Menten equation to obtain values for  $K_m$  of 1.8  $\mu\text{M}$  (95% confidence interval 1.3 to 2.4  $\mu\text{M}$ ), and  $k_{\text{cat}}$  of 6.8  $\text{min}^{-1}$  (95% confidence interval 6.1 to 7.4  $\text{min}^{-1}$ ). (B) Lineweaver-Burk plot. .

**Table S1.** ADAMTS13 activity and inhibitor titers

| Subject | ADAMTS13 Activity |                 | ADAMTS13 Inhibitor |                 |
|---------|-------------------|-----------------|--------------------|-----------------|
|         | Substrate rVWF71  | Substrate VWF73 | Substrate rVWF71   | Substrate VWF73 |
| 1       | <0.3              | <5              | <0.4               | <0.4            |
| 2       | <0.3              | <5              | <0.4               | <0.4            |
| 3       | <0.3              | <5              | 0.6                | 0.4             |
| 4       | <0.3              | <5              | 0.6                | <0.4            |
| 5       | <0.3              | <5              | 0.8                | <0.4            |
| 6       | <0.3              | <5              | 0.9                | 1.8             |
| 7       | <0.3              | <5              | 0.9                | <0.4            |
| 8       | <0.3              | <5              | 1.5                | 0.4             |
| 9       | <0.3              | <5              | 3.0                | 1.5             |
| 10      | <0.3              | <5              | 3.0                | 1.6             |
| 11      | <0.3              | <5              | 3.0                | 1.8             |
| 12      | <0.3              | <5              | 5.6                | 2.4             |
| 13      | <0.3              | <5              | 6.0                | 2.0             |
| 14      | <0.3              | <5              | 8.6                | 2.0             |
| 15      | <0.3              | <5              | 10                 | 2.8             |
| 16      | <0.3              | <5              | 10                 | 3.6             |
| 17      | <0.3              | <5              | 17                 | 6.8             |
| 18      | <0.3              | <5              | 82                 | >8.0            |
| 19      | 0.3               | <5              | <0.4               | <0.4            |
| 20      | 0.5               | <5              | 7.0                | 2.8             |
| 21      | 0.5               | <5              | 9.6                | 0.8             |
| 22      | 0.6               | <5              | 0.7                | <0.4            |
| 23      | 0.7               | <5              | 2.1                | 0.8             |
| 24      | 0.9               | <5              | <0.4               | <0.4            |
| 25      | 1.1               | <5              | 3.6                | 1.6             |
| 26      | 1.2               | <5              | 12                 | 4.8             |
| 27      | 1.4               | <5              | 1.3                | 0.4             |
| 28      | 1.4               | <5              | 3.5                | 2.8             |
| 29      | 1.5               | <5              | 1.0                | <0.4            |
| 30      | 1.6               | <5              | <0.4               | <0.4            |
| 31      | 2.0               | <5              | 0.7                | 0.4             |
| 32      | 2.1               | <5              | <0.4               | <0.4            |
| 33      | 2.4               | 6               | <0.4               | Not Done        |
| 34      | 2.8               | <5              | <0.4               | 0.4             |
| 35      | 3.6               | <5              | 0.8                | <0.4            |
| 36      | 3.9               | 20              | <0.4               | Not Done        |
| 37      | 4.3               | <5              | 0.8                | 1.6             |

|    |     |    |      |          |
|----|-----|----|------|----------|
| 38 | 4.4 | 12 | <0.4 | Not Done |
| 39 | 4.4 | 15 | <0.4 | Not Done |
| 40 | 4.7 | <5 | 13   | 4.8      |
| 41 | 5.6 | <5 | <0.4 | <0.4     |
| 42 | 5.6 | 21 | <0.4 | Not Done |
| 43 | 6.0 | <5 | 1.4  | 0.4      |
| 44 | 7.2 | 8  | <0.4 | Not Done |
| 45 | 8.8 | 22 | <0.4 | Not Done |
| 46 | 9.6 | <5 | 0.5  | 0.4      |
| 47 | 14  | 20 | <0.4 | Not Done |
| 48 | 15  | 30 | <0.4 | Not Done |
| 49 | 16  | 20 | <0.4 | Not Done |
| 50 | 18  | <5 | 2.2  | 1.0      |
| 51 | 20  | 29 | <0.4 | Not Done |
| 52 | 20  | 23 | <0.4 | Not Done |
| 53 | 20  | 27 | <0.4 | Not Done |
| 54 | 22  | 8  | 1.1  | Not Done |

Subjects included in this table had ADAMTS13 activity in citrated plasma samples <20% when assayed with either FRETTS-VWF73 or FRETTS-rVWF71. For highest sensitivity, plasma samples with ADAMTS13 activity <3% were assayed with FRETTS-rVWF71 using 100 µL of plasma per assay.

**Table S2. Comparison of ADAMTS13 activity assays for Li<sup>+</sup>-heparin plasma samples from patients with TTP**

| Enrolled Patient (Sample) | ADAMTS13 Activity      |                       |
|---------------------------|------------------------|-----------------------|
|                           | Substrate FRETs-rVWF71 | Substrate FRETs-VWF73 |
| 1                         | 3                      | <5                    |
| 2                         | 0                      | <5                    |
| 3 (1)                     | 5.2                    | <5                    |
| 3 (2)                     | 27.2                   | 30.5                  |
| 4 (1)                     | 0                      | <5                    |
| 4 (2)                     | 47.1                   | 51.3                  |
| 5 (1)                     | 1.1                    | <5                    |
| 5 (2)                     | 2.3                    | <5                    |
| 6                         | 5.6                    | <5                    |
| 7 (1)                     | 0.5                    | <5                    |
| 7 (2)                     | 16.8                   | 12.1                  |
| 7 (3)                     | 34.5                   | 36                    |
| 8                         | 3.8                    | <5                    |
| 9                         | 1                      | <5                    |

Li<sup>+</sup>-heparin plasma samples were obtained from patients with TTP enrolled in a clinical study at Washington University in St. Louis. Numbers in parentheses indicate samples obtained at distinct time points during the course of treatment. Assays with substrate FRETs-rVWF71 were performed using the standard method described under "Materials and Methods." Assays with substrate FRETs-VWF73 were performed as described by Kokame et al (7). Similar results were obtained with both assay methods.
